# Supplementary material for: Role of iron addition on grain boundary conductivity of pure and samarium doped cerium oxide
Source: Royal Society of Chemistry journal article supplement (doi:10.1039/c4ra07781d), 2014-09-01
Supplement: c4ra07781d1.pdf [file c4ra07781d1.pdf]

Electronic Supplementary Information

**Role of Iron Addition on Grain Boundary Conductivity of Pure and Samarium Doped  
Cerium Oxide**

P Arunkumar, S. Preethi, K Suresh Babu

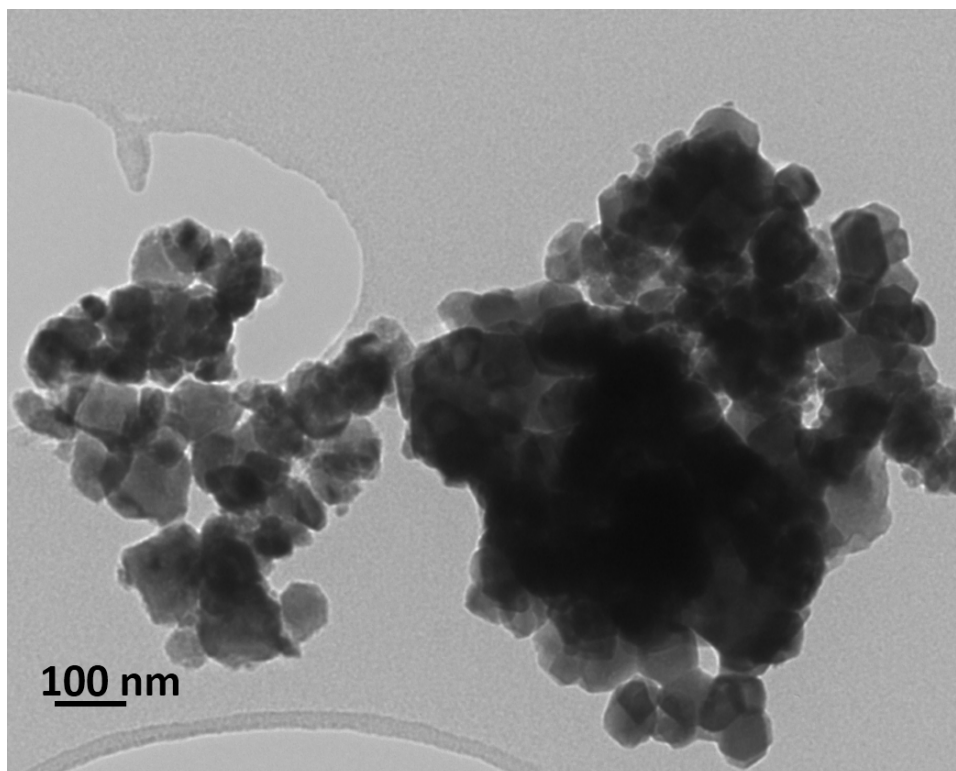

Supplementary Figure 1: TEM image of sintered CeO<sub>2</sub> pellets exhibiting higher particle sizes.

Particles fused together upon sintering to minimize the interfacial energy.
